# Supplementary material for: Enhancement of photocatalytic hydrogen evolution with catalysts based on carbonized MOF-5 and g-C3N4
Source: Royal Society of Chemistry journal article supplement (doi:10.1039/c9ra08388j), 2020-01-01
Supplement: c9ra08388j1.pdf [file c9ra08388j1.pdf]

Supplementary for

### Enhancement of photocatalytic hydrogen evolution with catalyst based on carbonized MOF-5 and g-C<sub>3</sub>N<sub>4</sub>

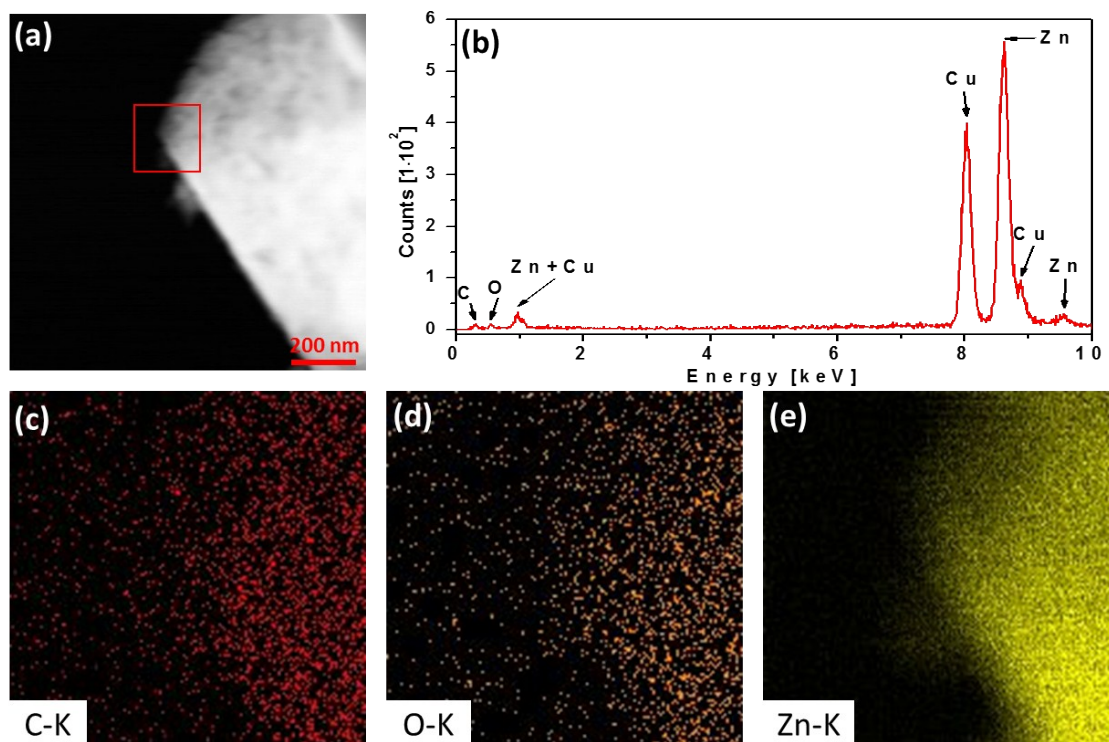

**Figure S1.** STEM image (a), EDX spectrum (b) and elemental mapping (c-e) of MOF5.

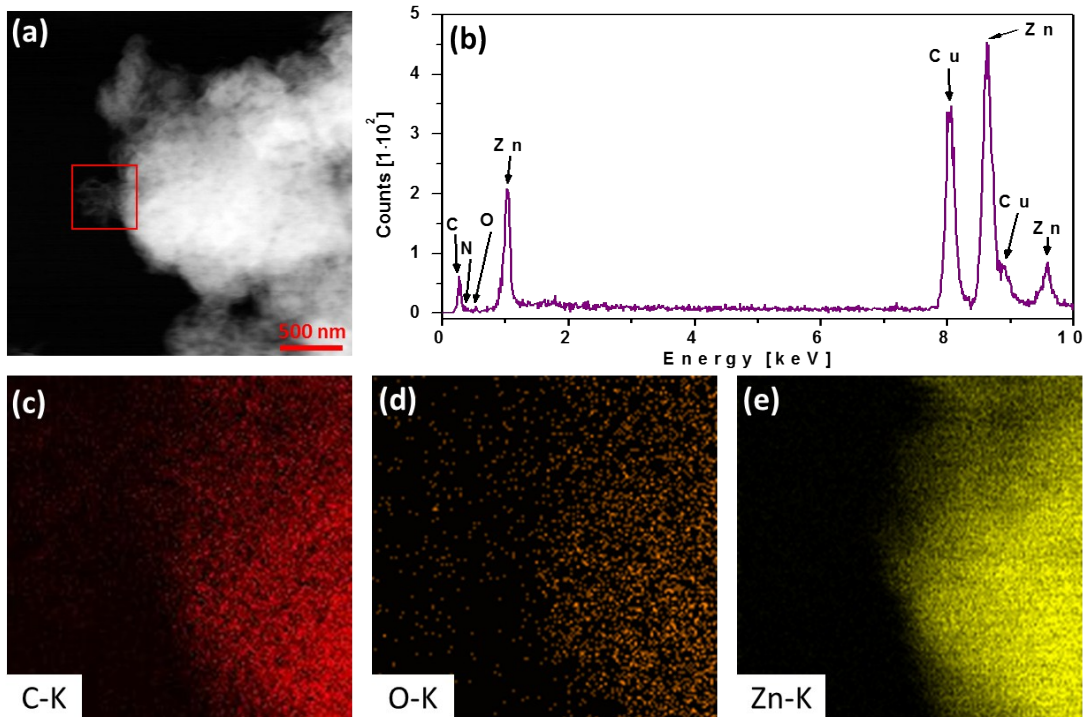

**Figure S2.** STEM image (a), EDX spectrum (b) and elemental mapping (c-e) of MOF5-gCN.

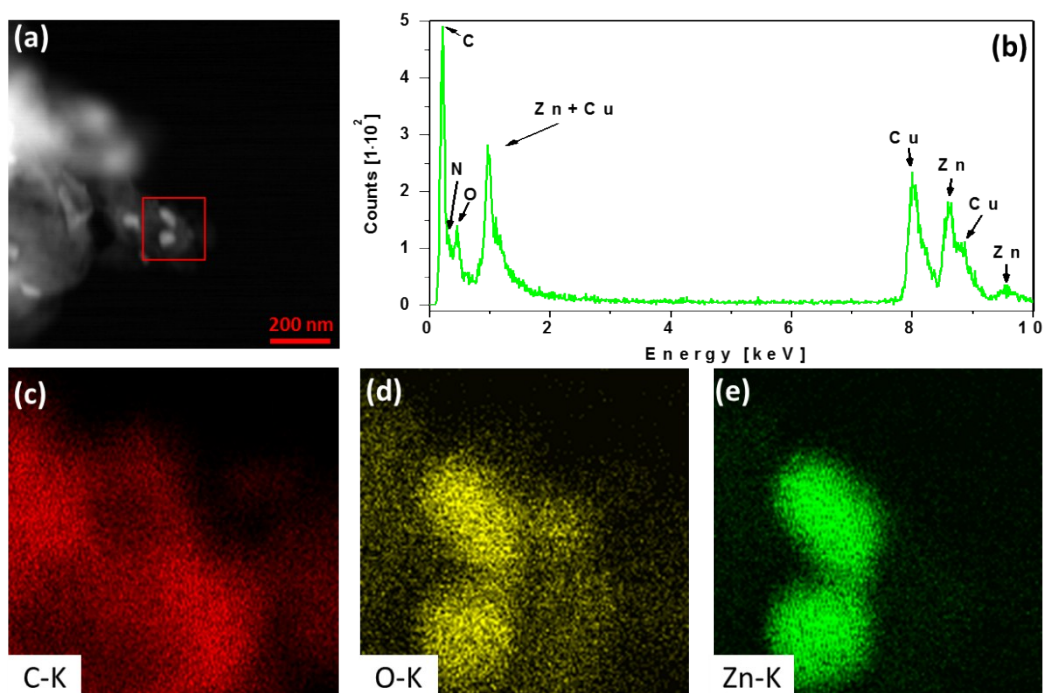

**Figure S3.** STEM image (a), EDX spectrum (b) and elemental mapping (c-e) of CMOF700.

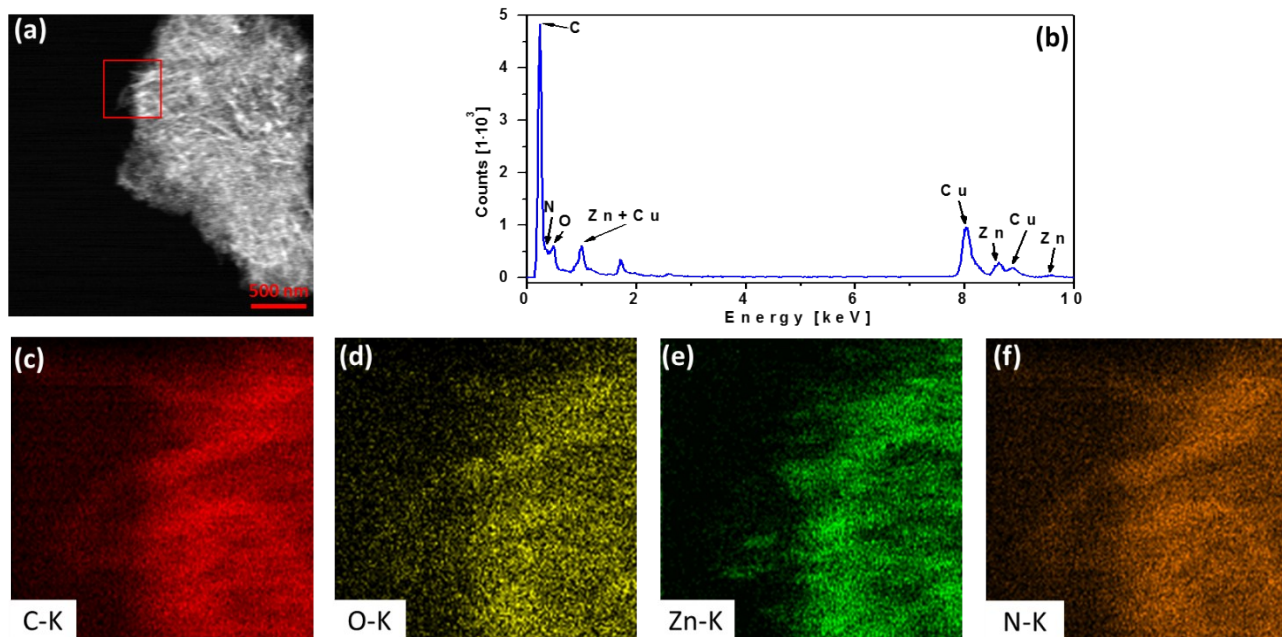

**Figure S4.** STEM image (a), EDX spectrum (b) and elemental mapping (c-f) of CMOF700-gCN.
